# Supplementary material
Source: publisher figshare collection journal article supplement (https://tandf.figshare.com/articles/dataset/_/7082780)
Supplement: Supplementary file 2 [file 1]

## Description of variables used in tables

The variables used in each table are presented below, sorted by table number. Descriptions for how each variable was created are provided in the following section.

**Table 1**

| Row | Variables                                     | Variables Used                                                                                                                                                   | Measurement Used                                         | Notes                                                                                                                                                                                              |
|-----|-----------------------------------------------|------------------------------------------------------------------------------------------------------------------------------------------------------------------|----------------------------------------------------------|----------------------------------------------------------------------------------------------------------------------------------------------------------------------------------------------------|
| 1   | Outpatient care                               | avgAdultOP                                                                                                                                                       | BL                                                       |                                                                                                                                                                                                    |
| 2   | Delivery                                      | avgDel                                                                                                                                                           | BL                                                       |                                                                                                                                                                                                    |
| 3   | No. of households in catchment area           | hhs                                                                                                                                                              | BL                                                       |                                                                                                                                                                                                    |
| 4   | No. of households per village                 | hhsPerVillage                                                                                                                                                    | BL                                                       |                                                                                                                                                                                                    |
| 5   | Drank safely today                            | drankSafely2004                                                                                                                                                  | BL                                                       |                                                                                                                                                                                                    |
| 6   | No. of days without electricity in past month | daysNoPwr2004                                                                                                                                                    | BL                                                       |                                                                                                                                                                                                    |
| 7   | Utilization                                   | avgAdultOP<br>avgDel                                                                                                                                             | BL<br>BL                                                 | SUR                                                                                                                                                                                                |
| 8   | Utilization Pattern                           | projectFacilityPct<br>NGOPct<br>pvtForProfPct<br>tradHealerPct<br>selfTxPct<br>otherGovtPct<br>otherHFPct                                                        | BL<br>BL<br>BL<br>BL<br>BL<br>BL<br>BL                   | SUR; reverse sign of visits to traditional healers and self-treatment (note that visits to CHWs were included in the denominator for all households, but the percentage was excluded from the SUR) |
| 9   | Quality Measures                              | waitingTime<br>equipmentUsed                                                                                                                                     | BL<br>BL                                                 | SUR                                                                                                                                                                                                |
| 10  | Catchment Area Statistics                     | hhs<br>hhsPerVillage<br>villagen<br>village1<br>village3                                                                                                         | BL<br>BL<br>BL<br>BL<br>BL                               | SUR                                                                                                                                                                                                |
| 11  | Health Facility Characteristics               | pipewater<br>radio<br>newspaper<br>sepMatUnit<br>distNearestLC1<br>distNearestPubPr<br>ov<br>totalAlevel<br>totalBelowAlevel<br>drankSafely2004<br>daysNoPwr2004 | BL<br>BL<br>BL<br>BL<br>BL<br>BL<br>BL<br>BL<br>BL<br>BL | SUR                                                                                                                                                                                                |
| 12  | Citizen Perceptions                           | polite<br>paidAttn<br>freeToExpress<br>informAbtDrugDel                                                                                                          | BL<br>BL<br>BL<br>BL                                     | SUR                                                                                                                                                                                                |

| <u>Row</u> | <u>Variables</u> | <u>Variables Used</u>                                                      | <u>Measurement Used</u>    | <u>Notes</u> |
|------------|------------------|----------------------------------------------------------------------------|----------------------------|--------------|
| 13         | Supply of drugs  | avgEryRecd<br>avgChlRecd<br>avgCotRecd<br>avgQuiRecd<br>avgMebRecd         | BL<br>BL<br>BL<br>BL<br>BL | SUR          |
| 14         | User charges     | avgDrugCharge<br>avgGenTxCharge<br>avgInjectionCharge<br>avgDeliveryCharge | BL<br>BL<br>BL<br>BL       | SUR          |

**Table 2**

| <u>Col.</u> | <u>Variables</u>                | <u>Variables Used</u>                                | <u>Measurement Used</u> | <u>Notes</u>                                                               |
|-------------|---------------------------------|------------------------------------------------------|-------------------------|----------------------------------------------------------------------------|
| 1           | Suggestion box                  | suggestionBox                                        | EL                      |                                                                            |
| 2           | Numbered waiting cards          | numWaitingCards                                      | EL                      |                                                                            |
| 3           | Poster informing free services  | posterFreeServices                                   | EL                      |                                                                            |
| 4           | Poster on patients' rights      | posterPtRts                                          | EL                      |                                                                            |
| 5           | Average standardised effect     | numWaitingCards<br>posterFreeServices<br>PosterPtRts | EL<br>EL<br>EL          | SUR (exclude suggestionBox since no control facility has a suggestion box) |
| 6           | Discuss facility in LC meetings | discFacLCMtgs                                        | EL                      |                                                                            |
| 7           | Received information about HUMC | recdInfoAbtHUMC                                      | EL                      |                                                                            |

**Table 3**

| <u>Row</u> | <u>Variables</u>              | <u>Variables Used</u>                                          | <u>Measurement Used</u> | <u>Notes</u>                                                             |
|------------|-------------------------------|----------------------------------------------------------------|-------------------------|--------------------------------------------------------------------------|
| 1          | Equipment used                | equipmentUsed                                                  | BL, EL                  |                                                                          |
| 2          | Equipment used                | equipmentUsed                                                  | EL                      |                                                                          |
| 3          | Waiting time                  | waitingTime                                                    | BL, EL                  |                                                                          |
| 4          | Waiting time                  | waitingTime                                                    | EL                      |                                                                          |
| 5          | Absence rate                  | absenceRate                                                    | EL                      |                                                                          |
| 6          | Management of clinic          | floorCondition<br>wallCondition<br>furnitureCondition<br>smell | EL<br>EL<br>EL<br>EL    | first component from a principle components analysis (Stata command pca) |
| 7          | Health information            | healthInfo                                                     | EL                      |                                                                          |
| 8          | Importance of family planning | impOfFP                                                        | EL                      |                                                                          |
| 9          | Stockouts                     | stockouts                                                      | EL                      |                                                                          |

**Table 4**

| <u>Col.</u> | <u>Variables</u> | <u>Variables Used</u> | <u>Measurement Used</u> | <u>Notes</u> |
|-------------|------------------|-----------------------|-------------------------|--------------|
|-------------|------------------|-----------------------|-------------------------|--------------|

| <u>Col.</u> | <u>Variables</u> | <u>Variables Used</u>                                      | <u>Measurement Used</u>    | <u>Notes</u> |
|-------------|------------------|------------------------------------------------------------|----------------------------|--------------|
| 1           | Newborn          | DPTImmInfant<br>BCGImm<br>polioImmInfant<br>vitASuppInfant | EL<br>EL<br>EL<br>EL       | SUR          |
| 2           | Under 1 year     | DPTImm<br>BCGImm<br>polioImm<br>vitASupp                   | EL<br>EL<br>EL<br>EL       | SUR          |
| 3           | 1 year old       | measlesImm<br>DPTImm<br>BCGImm<br>polioImm<br>vitASupp     | EL<br>EL<br>EL<br>EL<br>EL | SUR          |
| 4           | 2 years old      | measlesImm<br>DPTImm<br>BCGImm<br>polioImm<br>vitASupp     | EL<br>EL<br>EL<br>EL<br>EL | SUR          |
| 5           | 3 years old      | measlesImm<br>DPTImm<br>BCGImm<br>polioImm<br>vitASupp     | EL<br>EL<br>EL<br>EL<br>EL | SUR          |
| 6           | 4 years old      | measlesImm<br>DPTImm<br>BCGImm<br>polioImm<br>vitASupp     | EL<br>EL<br>EL<br>EL<br>EL | SUR          |

**Table 5**

| <u>Col.</u> | <u>Variables</u>                          | <u>Variables Used</u>                   | <u>Measurement Used</u> | <u>Notes</u> |
|-------------|-------------------------------------------|-----------------------------------------|-------------------------|--------------|
| 1           | Outpatients                               | avgAdultOP                              | EL                      |              |
| 2           | Delivery                                  | avgDel                                  | EL                      |              |
| 3           | Antenatal                                 | avgANC                                  | EL                      |              |
| 4           | Family Planning                           | avgFP                                   | EL                      |              |
| 5           | Average standardised effects              | avgAdultOP<br>avgDel<br>avgANC<br>avgFP | EL<br>EL<br>EL<br>EL    | SUR          |
| 6           | Use of project facility                   | projectFacilityPct                      | EL                      |              |
| 7           | Use of self-treatment/traditional healers | STTHPct                                 | EL                      |              |
| 8           | Average standardised effects              | projectFacilityPct<br>STTHPct           | EL<br>EL                | SUR          |
| 9           | Outpatients                               | avgAdultOP                              | BL, EL                  |              |
| 10          | Delivery                                  | avgDel                                  | BL, EL                  |              |
| 11          | Average standardised effects              | avgAdultOP<br>avgDel                    | BL, EL<br>BL, EL        | SUR          |

| <u>Col.</u> | <u>Variables</u>                          | <u>Variables Used</u>         | <u>Measurement Used</u> | <u>Notes</u> |
|-------------|-------------------------------------------|-------------------------------|-------------------------|--------------|
| 12          | Use of project facility                   | projectFacilityPct            | BL, EL                  |              |
| 13          | Use of self-treatment/traditional healers | STTHPct                       | BL, EL                  |              |
| 14          | Average standardised effects              | projectFacilityPct<br>STTHPct | BL, EL<br>BL, EL        | SUR          |

**Table 6**

| <u>Col.</u> | <u>Variables</u>        | <u>Variables Used</u> | <u>Measurement Used</u> | <u>Notes</u>       |
|-------------|-------------------------|-----------------------|-------------------------|--------------------|
| 1           | Births                  | numBirthsOverall      | EL                      |                    |
| 2           | Pregnancies             | pregnant              | EL                      |                    |
| 3           | U5MR                    | deathRatePer1000      | EL                      |                    |
| 4           | Child death             | death                 | EL                      |                    |
| 5, 6        | Weight-for-age z-scores | WAZ                   | EL                      | restrict to <  4.5 |

**Table 7**

| <u>Col.</u> | <u>Variables</u> | <u>Variables Used</u> | <u>Measurement Used</u> | <u>Notes</u> |
|-------------|------------------|-----------------------|-------------------------|--------------|
| 1, 3, 5, 7  | Outpatients      | avgAdultOP            | EL                      |              |
| 2, 4, 6, 8  | U5MR             | deathRatePer1000      | EL                      |              |

| <u>Row</u> | <u>Variables</u>                       | <u>Variables Used</u> | <u>Measurement Used</u> | <u>Notes</u> |
|------------|----------------------------------------|-----------------------|-------------------------|--------------|
| 1          | Community monitoring index             | monitoringIndex       | EL                      |              |
| 2          | Staff's knowledge about patient rights | patRightsIndex        | EL                      |              |
| 4          | CBO Presence                           | CBOBefore             | BL                      |              |

**Table 8**

| <u>Row</u> | <u>Variables</u>                            | <u>Variables Used</u> | <u>Measurement Used</u> | <u>Notes</u> |
|------------|---------------------------------------------|-----------------------|-------------------------|--------------|
| 1          | Number of adults in household               | numAdults             | BL                      |              |
| 2          | Any children under 5 in household           | childUnder5InHH       | BL                      |              |
| 3          | Number of children under 5 in the household | numChildrenUnder5     | BL                      |              |
| 4          | Pregnancy in household in last year         | pregnant              | BL                      |              |
| 5          | Respondent has secondary education          | secondaryEdu          | BL                      |              |
| 6          | Low quality walls                           | lowQualWalls          | BL                      |              |
| 7          | Low quality roof                            | lowQualRoof           | BL                      |              |

**Table 9**

| <u>Row</u> | <u>Variables</u>                          | <u>Variables Used</u> | <u>Measurement Used</u> | <u>Notes</u>                   |
|------------|-------------------------------------------|-----------------------|-------------------------|--------------------------------|
| 1          | Age-appropriate measles immunization dose | measlesImm            | BL                      | restrict to children >2 months |

| <u>Row</u> | <u>Variables</u>                        | <u>Variables Used</u> | <u>Measurement Used</u> | <u>Notes</u> |
|------------|-----------------------------------------|-----------------------|-------------------------|--------------|
| 2          | Age-appropriate DPT immunization dose   | DPTAppropriate        | BL                      |              |
| 3          | Age-appropriate BCG immunization dose   | BCGImm                | BL                      |              |
| 4          | Age-appropriate polio immunization dose | polioAppropriate      | BL                      |              |
| 5          | Vitamin A supplementation (number)      | vitASupp              | BL                      |              |

**Table 10**

| <u>Column n</u> | <u>Variables</u> | <u>Variables Used</u>                                      | <u>Measurement Used</u>    | <u>Notes</u>                        |
|-----------------|------------------|------------------------------------------------------------|----------------------------|-------------------------------------|
| 1               | Newborn          | DPTImmInfant<br>BCGImm<br>polioImmInfant<br>vitASuppInfant | BL<br>BL<br>BL<br>BL       | SUR; analysis is at the child level |
| 2               | Under 1 year     | DPTImm<br>BCGImm<br>polioImm<br>vitASupp                   | BL<br>BL<br>BL<br>BL       | SUR; analysis is at the child level |
| 3               | 1 year old       | measlesImm<br>DPTImm<br>BCGImm<br>polioImm<br>vitASupp     | BL<br>BL<br>BL<br>BL<br>BL | SUR; analysis is at the child level |
| 4               | 2 years old      | measlesImm<br>DPTImm<br>BCGImm<br>polioImm<br>vitASupp     | BL<br>BL<br>BL<br>BL<br>BL | SUR; analysis is at the child level |
| 5               | 3 years old      | measlesImm<br>DPTImm<br>BCGImm<br>polioImm<br>vitASupp     | BL<br>BL<br>BL<br>BL<br>BL | SUR; analysis is at the child level |
| 6               | 4 years old      | measlesImm<br>DPTImm<br>BCGImm<br>polioImm<br>vitASupp     | BL<br>BL<br>BL<br>BL<br>BL | SUR; analysis is at the child level |

**Table 11**

| <u>Column</u> | <u>Variables</u>        | <u>Variables Used</u> | <u>Measurement Used</u> | <u>Notes</u>       |
|---------------|-------------------------|-----------------------|-------------------------|--------------------|
| 1, 2          | Births                  | numBirthsOverall      | EL                      |                    |
| 3, 4          | Pregnancies             | pregnant              | EL                      |                    |
| 5, 6          | U5MR                    | deathRatePer1000      | EL                      |                    |
| 7             | Child death             | death                 | EL                      |                    |
| 8-11          | Weight-for-age z-scores | WAZ                   | EL                      | restrict to <  4.5 |
| all           | CBO Presence            | CBOBefore             | BL                      |                    |

**Table 12**

| <u>Row</u> | <u>Variables</u>                    | <u>Variables Used</u> | <u>Measurement Used</u> | <u>Notes</u> |
|------------|-------------------------------------|-----------------------|-------------------------|--------------|
| 1          | Number of outreach visits per month | avgOutreach           | BL, EL                  |              |
| 2          | Household is aware of program       | awareOfCBM            | EL                      |              |

**Figures 1 and 2**

| <u>Column</u> | <u>Variables</u>           | <u>Variables Used</u>                                       | <u>Measurement Used</u>              | <u>Notes</u>                           |
|---------------|----------------------------|-------------------------------------------------------------|--------------------------------------|----------------------------------------|
| 1             | Newborn immunizations      | DPTImmInfant<br>BCGImm<br>polioImmInfant<br>vitASupplInfant | BL, EL<br>BL, EL<br>BL, EL<br>BL, EL | SUR, analysis is at the facility-level |
| 2             | Under 1 year immunizations | DPTImm<br>BCGImm<br>polioImm<br>vitASuppl                   | BL, EL<br>BL, EL<br>BL, EL<br>BL, EL | SUR, analysis is at the facility-level |
